# Supplementary material
Source: PubMed Central journal article supplement (PMC3694700)
Supplement: supp_tpc.113.111849_tpc111849Supplemental-2.pdf [file supp_tpc.113.111849_tpc111849Supplemental-2.pdf]

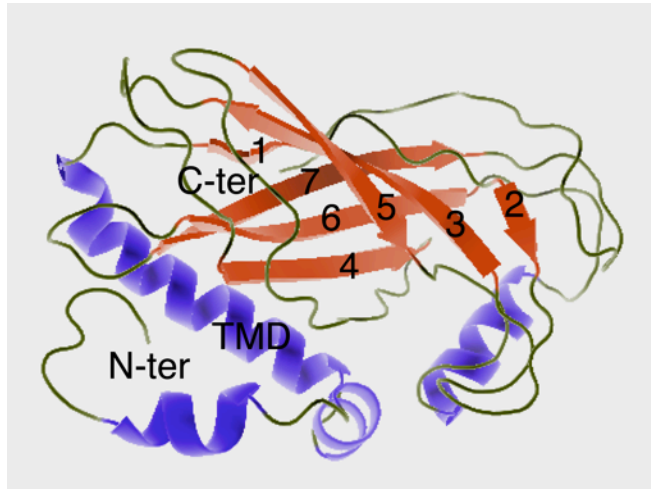

**Supplemental Figure 1**

**Predicted 3D model of NHL26 structure**

Three-dimensional model of NHL26. This model is based on structural similarities with LEA14 and includes a predicted  $\alpha$ - $\beta$  fold for NHL26 consisting of parallel and anti-parallel  $\beta$ -strands. N- and C-terminal ends are indicated (N-ter and C-ter). The seven  $\beta$ -sheets are numbered from N- to C-ter positions. The transmembrane domain (TMD) characterized by a hydrophobic  $\alpha$ -helix fold is indicated. The N-terminal region is predicted to lie in the cytosol.

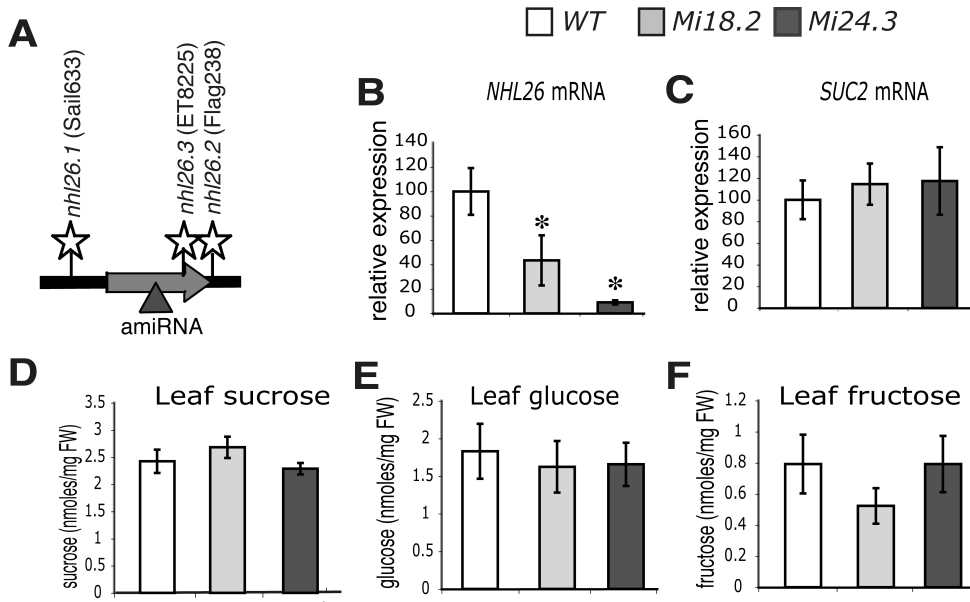

Supplemental Figure 2

**Characterization of *nhl26* mutants and *NHL26*-overexpressing lines**

These data reveal that amiRNA lines showed a significantly lower than WT accumulation of *NHL26* mRNA. However, the regulation of *SUC2* and the sugar content in the source leaves were unaffected.

(A) Map indicating the position of the insertions in the *nhl26* mutants (top labels) and of the sequence targeted by the amiRNA (bottom label). The mutants are *nhl26-1* (line Sail633, in Col-0); *nhl26-2* (line Flag238, in Ws4) and *nhl26-3* (ET822, in Landsberg Erecta). The sets of primers used for the genotyping of these mutants were as follows:

For the Sail mutant: 5'-CGG TCGTTC TTTT GCTTTATG-3'; 5'-TGAAAAGCTGCTTTTGTGGAG-3' and 5'-TCCATA ACCAATCTCGATACA C-3'. For the FLAG mutant, 5'-AAAGGGCTTTACTTAATTCTT CCC-3'; 5'-GGATTAACATCAACAATCGCC-3' and 5'-CGATCCAGACTGAATGCCC-3'.

For the Landsberg Erecta mutant: 5'-GCGCCAAGAAAGGAGGGATTAA-3' and 5'-AATGAAGCTAAGGGAGGAGTGG-3' and 5'-CGATCCAGACTGAATGCCC-3'.

(B) Relative expression of *NHL26* in WT, two representative amiRNA lines. *NHL26* mRNA accumulation in the rosette leaves was assessed by RT-qPCR. Expression was normalized relative to levels of *TIP41* RNA. Values are expressed as percentages of wild-type values. Error bars indicate the SEM ( $n=12$ ).

(C) Relative expression of *SUC2* in WT and amiRNA lines. *SUC2* RNA accumulation in the rosette leaves was assessed by RT-qPCR. Expression was normalized relative to levels of *TIP41* RNA. Values are expressed as percentages of wild-type values. Error bars indicate +/- SE ( $n=12$ ).

(D) to (F) Sugar content in the rosette leaves in WT and the amiRNA lines. (D): sucrose content; (E): glucose content; (F): fructose content. Error bars indicate +/- SE ( $n=8$ ).

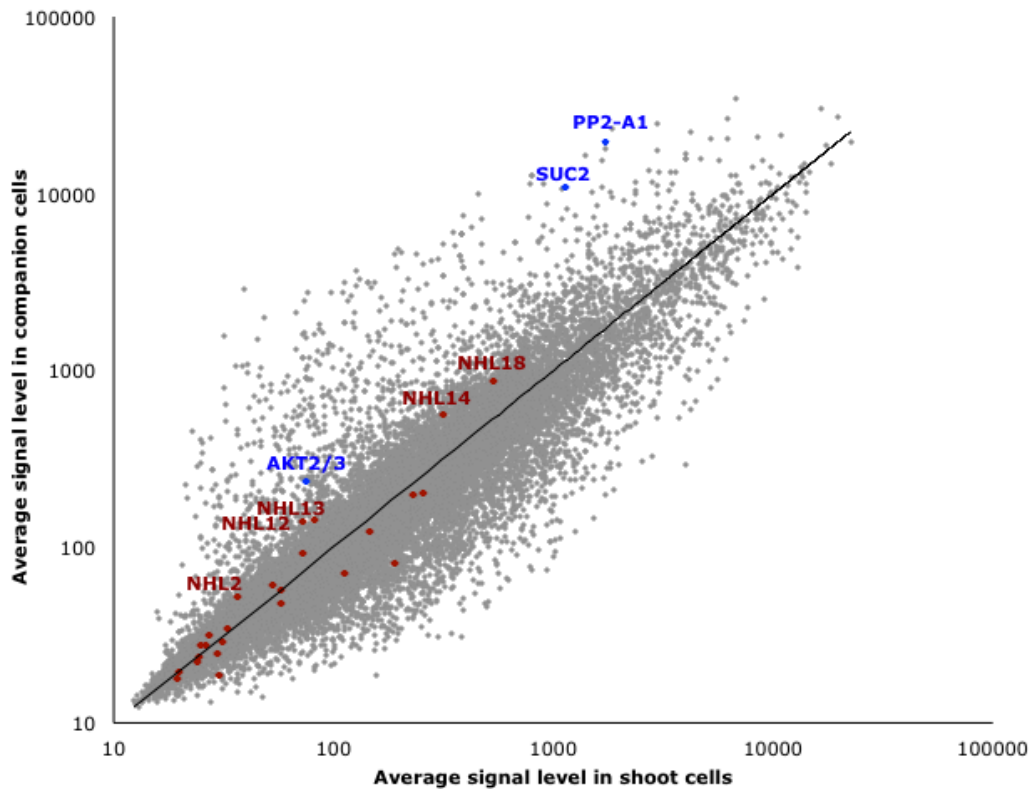

### Supplemental Figure 3

#### Scatter plot of the expression of *NHL* genes in phloem cells and other cell types

Profile of expression for *NHL* genes reported on a scatter plot comparison of companion cell and other cell type expression profiles from the shoot, extracted from the transcriptome dataset described by Murot et al., 2009.

For each gene probe set, the normalized expression value in companion cells (i.e. the SSUC2C set of values, obtained from cells sorted with a pSUC2-GFP fusion in the shoot) is plotted on the Y axis and the mean level of expression in other shoot cell types is plotted on the X axis (mean signals for STotC, S35SC, SRBC, SS2-2C, SGL2C, SCERC, SKATC datasets).

Both axes are logarithmic. Values above the diagonal indicate higher levels of expression in the phloem companion cells than in other cell types.

The whole set of *Arabidopsis* gene probes present on the Affymetric array is represented as gray dots.

For comparison with phloem-specific genes, the expression values for *PP2-A1*, *SUC2* and *AKT2/3* are indicated as blue dots: *PP2-A1* (*At4g19840*); *SUC2* (*At1g22710*); *AKT2/3* (*At4g22200*).

The expression values for the following *NHL* genes are indicated as red dots: *NHL 1/ SEC22* (*At3g11660*); *NHL 2* (*At3g11650*); *NHL 3* (*At5g06320*); *NHL 4* (*At1g54540*); *NHL 5* (*At1g61760*); *NHL 6* (*At1g65690*); *NHL 9* (*At2g35460*); *NHL10/YLS9* (*At2g35980*); *NHL12* (*At2g35960*); *NHL13* (*At2g27080*); *NHL14* (*At2g27260*); *NHL15* (*At2g01080*); *NHL18* (*At3g52470*); *NHL20* (*At4g26490*); *NHL23* (*At5g06330*); *NHL28* (*At5g11890*); *NHL30* (*At1g17620*); *NHL34* (*At1g13050*); *NHL37* (*At3g52460*); *NHL38* (*At3g20590*); *NHL40* (*At3g26350*); *NHL42* (*At4g01110*); *NHL49* (*At4g35170*); *NHL51* (*At5g22870*); *NHL52* (*At2g41990*). The names of the *NHL* genes more strongly expressed in phloem cells are reported on the scatter plot.

The following *NHL* genes were not present on the array: *NDR 1* (*At3g20600*); *NHL11* (*At2g35970*); *NHL16* (*At3g20610*); *NHL17* (*At3g44220*); *NHL19* (*At4g01410*); *NHL21* (*At4g05220*); *NHL22* (*At4g09590*); *NHL25* (*At5g36970*); *NHL26* (*At5g53730*); *NHL36* (*At2g46300*); *NHL43* (*At5g56050*); *NHL45* (*At5g22200*); *NHL46* (*At5g21130*); *NHL47* (*At5g05657*); *NHL48* (*At1g08160*); *NHL50* (*At2g27270*).

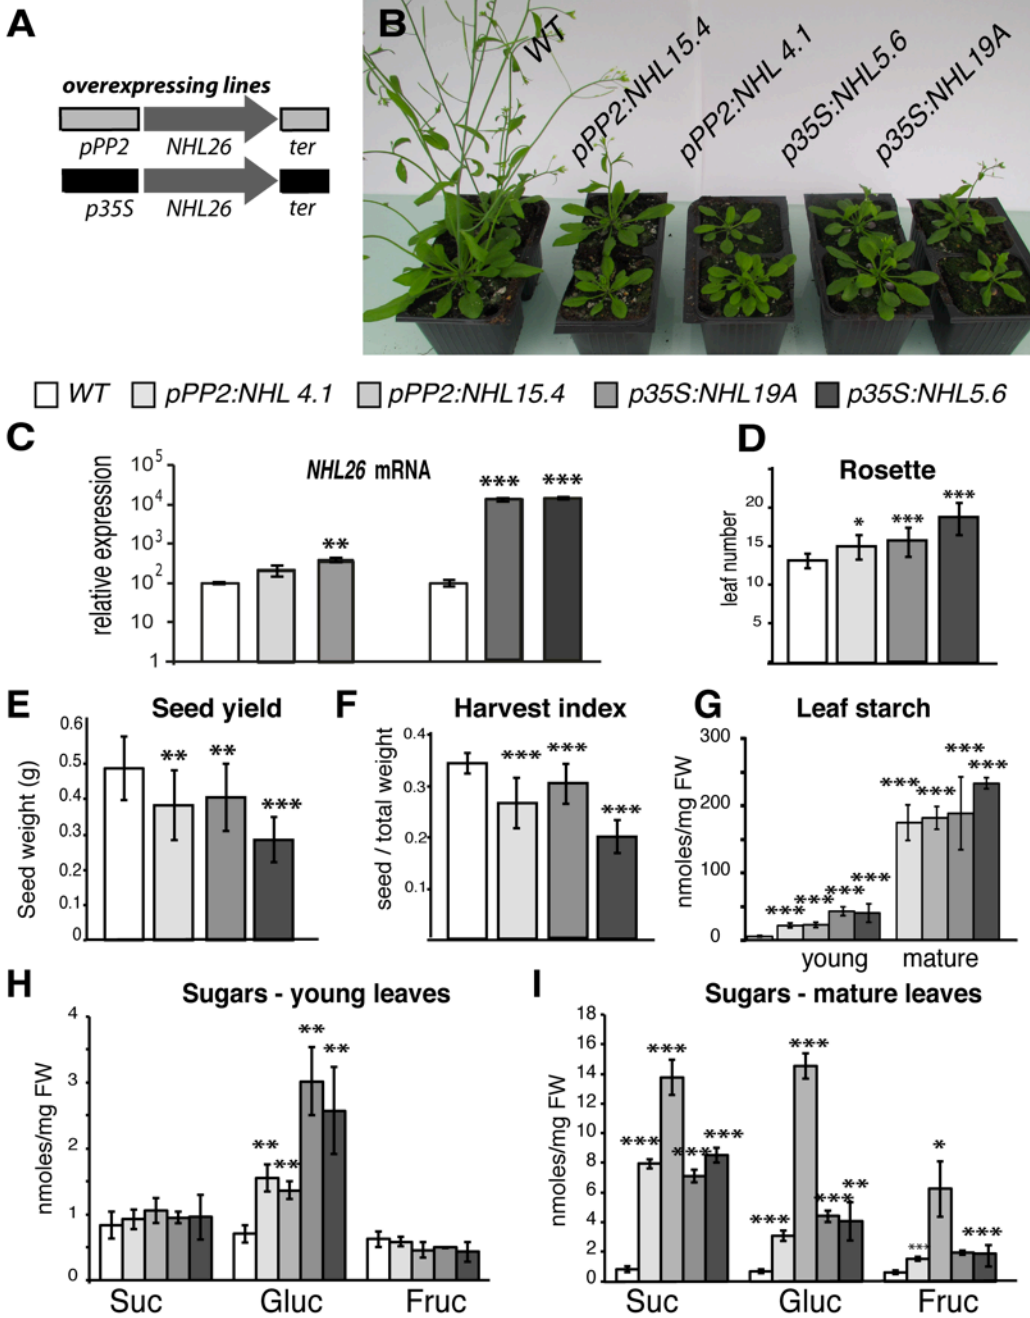

Supplemental Figure 4

Characterization of *NHL26*-overexpressing lines

(A) Schematic map of the constructs used in *NHL26*-overexpressing

(B) Phenotype of *NHL26*-overexpressing plants, grown in long-day conditions in greenhouse (five-week-old plants)

(C) Relative expression of *NHL26* in *NHL26*-overexpressing lines. *NHL26* mRNA accumulation in the rosette leaves was assessed by qRT-PCR. Expression was normalized relative to levels of *TIP41* RNA. Values are expressed as percentages of wild-type values. Error bars indicate +/- SE ( $n=6$ ).

(D) Number of rosette leaves at flowering time in the *pPP2:NHL* and *p35S:NHL* transgenic plants, as compared with wild-type plants. Asterisks (\*) indicate values significantly different in a *t* test (\*:  $P < 0.05$ ; \*\*:  $P < 0.01$ ; \*\*\*:  $P < 0.001$ ). Error bars indicate the standard error of the mean ( $n=10$ ).

(E-F) Yield parameters for plants grown in long-day conditions in the greenhouse. (E) Seed weight and (F) Harvest index calculated as the ratio of seed weight to dry weight of the aerial part of the plant (including rosette, stem and seeds). Error bars indicate the standard error of the mean ( $n=12$ ).

(G) Starch content of the rosette leaves of *pPP2:NHL*- and *p35S:NHL*-expressing and wild-type plants. Plants were harvested at stage 6.0. The data points and error bars represent the mean and standard error ( $n=6$ ).

(H) and (I) Sucrose, glucose and fructose in (H) young rosette leaves that are still expanding and (I) mature rosette leaves of *pPP2:NHL*- and *p35S:NHL*-expressing plants and wild-type. Plants were harvested at stage 6.10. The data points and error bars represent the mean and standard error ( $n=6$ ).

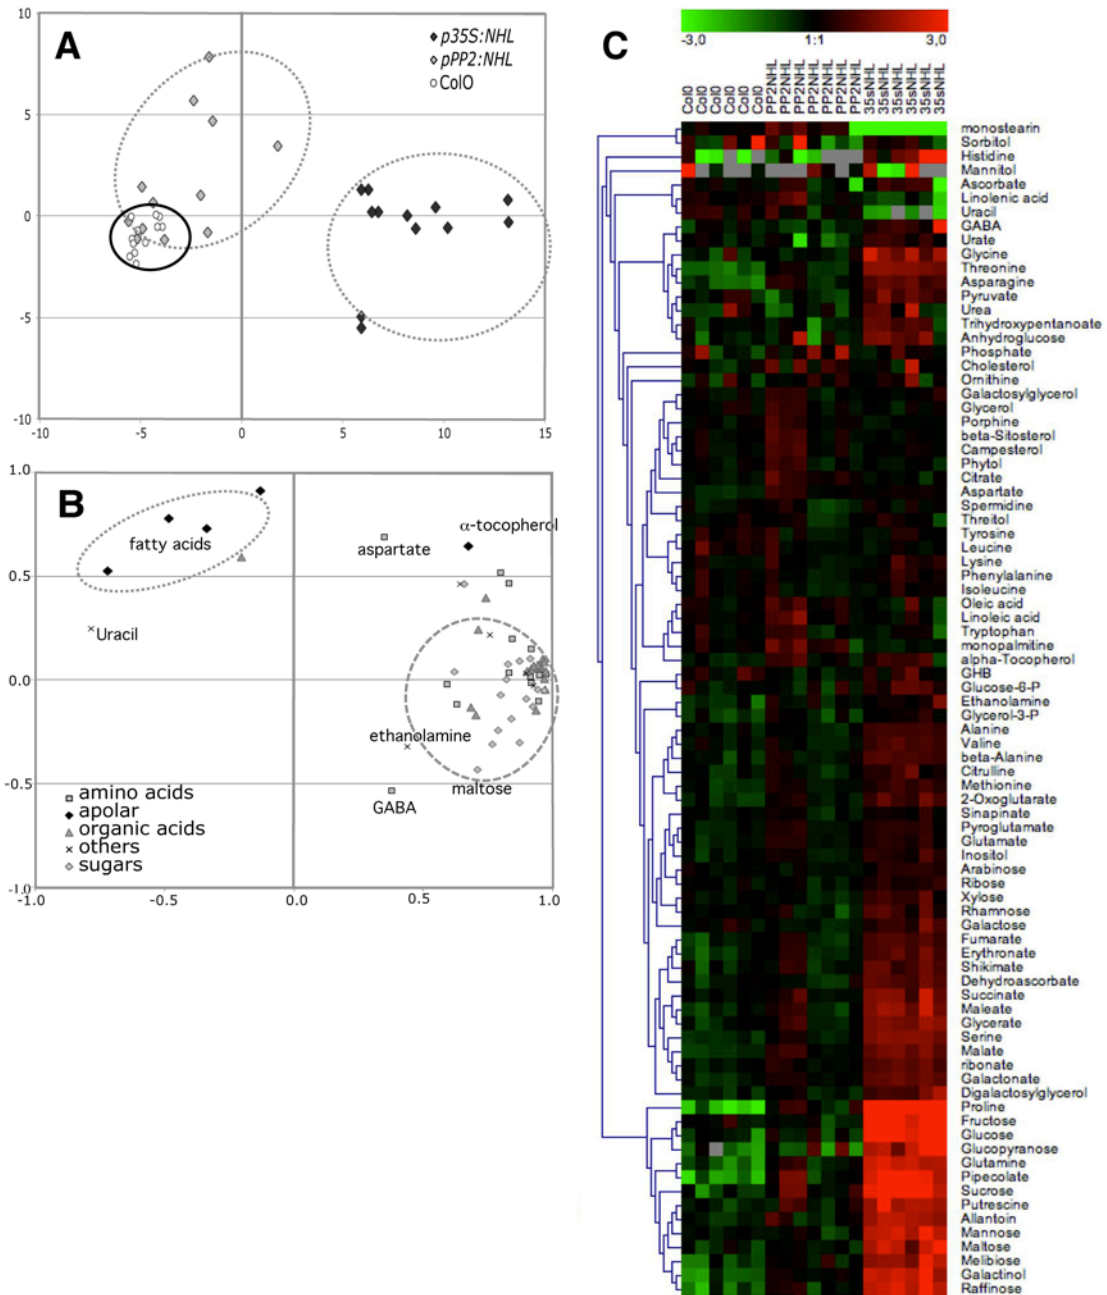

Supplemental Figure 5

**Metabolic profiling in *NHL26*-overexpressing lines**

(A) and (B) Principal component analysis of the data obtained by GC-MS, for compounds showing significant differences between plant lines ( $p < 0.01$ ).

(A) PCA of the genotypes. (B) PCA of metabolites. The main group (right side) is composed of compounds that are significantly overabundant in the expressing lines. It includes sugars (sucrose, fructose, glucose, mannose, galactinol, raffinose, melibiose, xylose, rhamnose, arabinose, ribose, galactose, maltose and glucose-6-P), amino acids (Ser, Thr, Pro, Met, Gln, Glu, Val, Asn, Ala, His, Gly), organic acids (galactonate, glycerate, maleate, malate, erythronate, fumarate, 2-oxoglutarate, pipercolate, dehydroascorbate, shikimate, ribonate, succinate, sinapinate, trihydroxypentanoate, pyruvate, urate), and other compounds (allantoin, putrescine, inositol, glycerol-3-P).

(C) Hierarchical clustering analysis of metabolite profiles for rosette leaves from *pPP2:NHL*- and *p35S:NHL*-expressing plants, and a comparison with wild-type plants. The values represent the normalized values for each compound after Log2 transformation. Dendrograms summarize the relatedness of metabolites (right). The heat map shows high (red) and low (green) metabolite levels with respect to the row and column means.

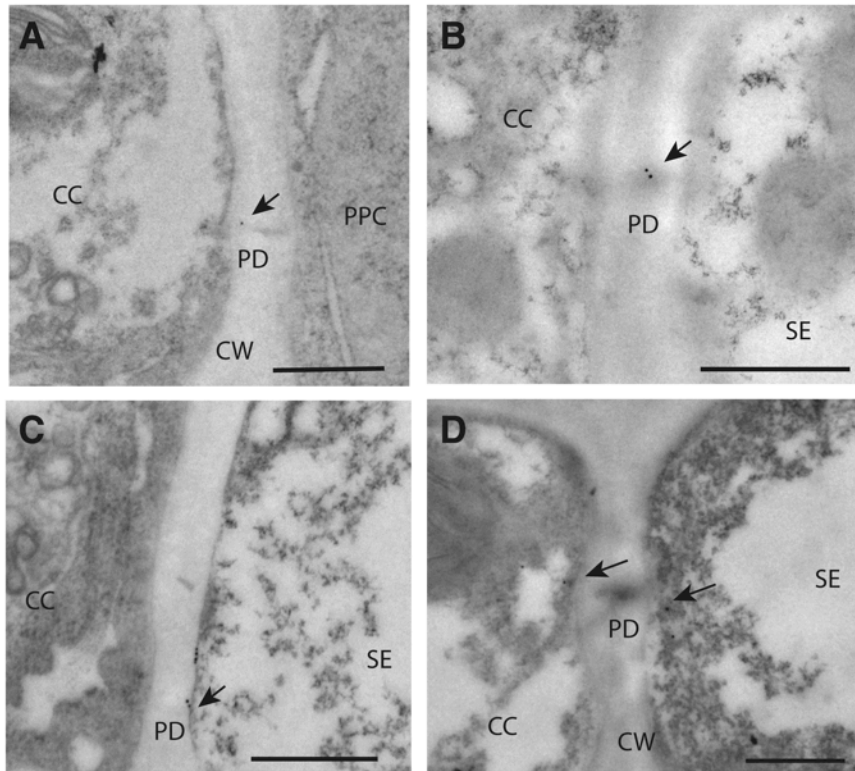

**Supplemental Figure 6**

**Localization of NHL26 in plasmodesmata**

Observation by transmission immunoelectron microscopy of the NHL26-GFP fusion protein with an anti-GFP antibody in phloem cells in *pNHL:NHL-GFP Arabidopsis* plants. (A-D) Details of localization between sieve elements and companion cells, showing a localization to plasmodesmata. Arrows indicate gold particles conjugated to an anti-GFP polyclonal antibody. Bars=500 nm.

**Supplemental Table 1. Description of the binary vectors derived from the *NHL26* gene sequence.**

Sequences in bold: gene-specific sequences. Sequences in italics: *attb1* and *attb2* sequences.

Underlined sequences: *NHL26*-specific sequences. CDS: coding sequence.

| Construct                                | Characteristics                                                      | Sequence                                                | Primers<br>(5'-3')                                                                                                                                                | Binary<br>vector                                        | Reference                           |
|------------------------------------------|----------------------------------------------------------------------|---------------------------------------------------------|-------------------------------------------------------------------------------------------------------------------------------------------------------------------|---------------------------------------------------------|-------------------------------------|
| <i>pNHL:GUS</i>                          | Transcriptional fusion<br><i>NHL26:GUS</i>                           | Promoter<br><i>At5g53730</i>                            | +: <i>aaaaaagcaggct</i> <b><u>ttcctcatgt</u></b><br><b><u>cttcgagac</u></b><br>- : <i>aagaaagctgggt</i> <b><u>ttggagaga</u></b><br><b><u>gagatgatgatg</u></b>     | pBI101-<br>R1R2-GUS-<br>tNOS<br>[Kan <sup>R</sup> ]     | Divol et al.,<br>2007               |
| <i>pBI101-<br/>pPP2A1-<br/>R1R2-tNOS</i> | Expression vector<br>driving expression<br>in the phloem             | Promoter<br><i>At4g19840</i><br>( <i>PP2A1</i> )        | +: <b><u>attatgttcttatcaccctaaatag</u></b><br>- : <b><u>ccagtatgatgtatttattttg</u></b>                                                                            | pBI101-<br>R1R2-tNOS<br>[Kan <sup>R</sup> ]             | this work                           |
| <i>pPP2:NHL</i>                          | Ectopic expression<br>of <i>NHL26</i> with<br><i>PP2-A1</i> promoter | Promoter<br><i>At4g19840</i><br>CDS<br><i>At5g53730</i> | +: <i>aaaaaagcaggct</i> <b><u>atgtctcaaa</u></b><br><b><u>tctccataac</u></b><br>- : <i>aagaaagctgggt</i> <b><u>catatagtt</u></b><br><b><u>gtagagcaac</u></b>      | pBI101-<br>pPP2:A1-<br>R1R2-tNOS<br>[Kan <sup>R</sup> ] | this work                           |
| <i>p35S:NHL</i>                          | Overexpression of<br><i>NHL26</i> , with 35S<br>promoter             | CDS<br><i>At5g53730</i>                                 | +: <i>aaaaaagcaggct</i> <b><u>atgtctcaaa</u></b><br><b><u>atctccataac</u></b><br>- : <i>aagaaagctgggt</i> <b><u>catatagtt</u></b><br><b><u>gttagagcaac</u></b>    | pMDC32<br>[Hygro <sup>R</sup> ]                         | Curtis and<br>Grossniklaus,<br>2003 |
| <i>p35S:NHL-<br/>GFP</i>                 | <i>NHL26-GFP</i><br>fusion, with 35S<br>promoter                     | CDS<br><i>At5g53730</i>                                 | +: <i>aaaaaagcaggct</i> <b><u>atgtctcaaa</u></b><br><b><u>tctccataac</u></b><br>- : <i>aagaaagctgggt</i> <b><u>gtatagttgta</u></b><br><b><u>gagcaacgag</u></b>    | pMDC83<br>[Hygro <sup>R</sup> ]                         | Curtis and<br>Grossniklaus,<br>2003 |
| <i>p35S:GFP-<br/>NHL</i>                 | <i>NHL26-GFP</i><br>fusion with 35S<br>promoter                      | CDS<br><i>At5g53730</i>                                 | +: <i>aaaaaagcaggct</i> <b><u>tttctcaaa</u></b><br><b><u>tctccataacttctc</u></b><br>- : <i>aagaaagctgggt</i> <b><u>gtatagtt</u></b><br><b><u>gtagacaacgag</u></b> | PMDC45<br>[Hygro <sup>R</sup> ]                         | Curtis and<br>Grossniklaus,<br>2003 |
| <i>pNHL:NHL-<br/>GFP</i>                 | <i>NHL26-GFP</i><br>fusion, with its<br>own promoter                 | Promoter<br>and CDS<br><i>At5g53730</i>                 | +: <i>aaaaaagcaggct</i> <b><u>ttcctcatgt</u></b><br><b><u>cttcgagac</u></b><br>- : <i>aagaaagctgggt</i> <b><u>gtatagtt</u></b><br><b><u>gtagacaacgag</u></b>      | pMDC107<br>[Hygro <sup>R</sup> ]                        | Curtis and<br>Grossniklaus,<br>2003 |
| <i>pNHL:NHL-<br/>CFP</i>                 | <i>NHL26-CFP</i><br>fusion, with its<br>own promoter                 | Promoter<br>and CDS<br><i>At5g53730</i>                 | +: <i>aaaaaagcaggct</i> <b><u>ttcctcatgtc</u></b><br><b><u>ttccgagac</u></b><br>- : <i>aagaaagctgggt</i> <b><u>gtatagttgta</u></b><br><b><u>gagcaacgag</u></b>    | pGHGWC<br>[Hygro <sup>R</sup> ]                         | Zhong et al.,<br>2008               |

**Supplemental Table 2. Primers used for RT-PCR experiments.**

| Gene                             | AGI Accession number | Experiment | Primer sequence (5'-3')                                         |
|----------------------------------|----------------------|------------|-----------------------------------------------------------------|
| <i>NHL26</i>                     | <i>At5g53730</i>     | RT-PCR     | + : gcgccaagaaaggaggatta<br>- : aatgaagctaaggaggagtg            |
| <i>EF-1<math>\alpha</math>A4</i> | <i>At5g60390</i>     | RT-PCR     | + : atgactttgatcttgcttactg<br>- : ttggcggcacccttagctggatca      |
| <i>G6PT</i>                      | <i>At1g61800</i>     | RT-PCR     | + : cgtcttcttctccaccgctat<br>- : tgatgtgtggaaggaaactgc          |
| <i>PR1</i>                       | <i>At2g14610</i>     | RT-PCR     | + : cttgtaggtgctcttcttctc<br>- : ttagtatggcttctctgtcaca         |
| <i>PR2</i>                       | <i>At3g57260</i>     | RT-PCR     | + : cactgacaccaccactgatac<br>- : tctccgacaccacgattcc            |
| <i>NHL26</i>                     | <i>At5g53730</i>     | qRT-PCR    | + : gttgccagtcctttggtta<br>- : tgtcattccaaaagccaca              |
| <i>SUC2</i>                      | <i>At1g22710</i>     | qRT-PCR    | + : tgcctttcacgatgactgag<br>- : ttccttgaagctccgaaga             |
| <i>AAP2</i>                      | <i>At5g09220</i>     | qRT-PCR    | + : cattgttgccacctcgttg<br>- : aaaccctaacgccctaaga              |
| <i>NRT1.7</i>                    | <i>At1g69870</i>     | qRT-PCR    | + : caacagtcagttccagagcacat<br>- : cgacagtcacaaggaaactactaaggta |
| <i>LHCB1</i>                     | <i>At1g29920</i>     | qRT-PCR    | + : ggggtcagcggatagaccag<br>- : ctltcggcgaaggctgt               |
| <i>RBCS</i>                      | <i>At5g38410</i>     | qRT-PCR    | + : ccgcaacaagtggattccttgg<br>- : aatgagcagagataattcataagaatg   |
| <i>TIP41</i>                     | <i>At4g34270</i>     | qRT-PCR    | + : tccatcagtcagaggcttcc<br>- : gctcatcggtacgctctttt            |
| <i>APT</i>                       | <i>At1g27450</i>     | qRT-PCR    | + : gagacatttgcgtgggatt<br>- : cggggattttaagtgaaca              |
| <i>UBI10</i>                     | <i>At4g05320</i>     | qRT-PCR    | + : cgtggtggttctaaatctcgt<br>- : gattatacaaggcccaaaaca          |
